# Supplementary material
Source: PubMed Central journal article supplement (PMC7934576)
Supplement: mmc1.pdf [file mmc1.pdf]

**YMTHE, Volume 29**

**Supplemental Information**

**Dystrophin Gene-Editing Stability Is Dependent  
on Dystrophin Levels in Skeletal but Not  
Cardiac Muscles**

**Niclas E. Bengtsson, Hichem Tasfaout, Stephen D. Hauschka, and Jeffrey S. Chamberlain**

## Supplemental Data:

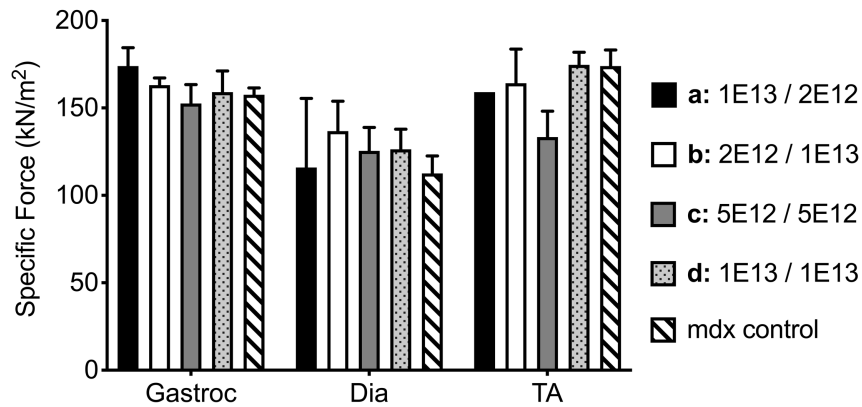

**Figure S1: Systemic gene editing to delete the 45 kb genomic region between dystrophin exons 52-53 fails to improve muscle strength at 12 weeks post-treatment.** Functional assessment of muscle specific force generation for gastrocnemius (Gastroc), diaphragm (Dia) and tibialis anterior (TA) muscles of treated versus untreated mice. Doses indicated are for the nuclease/target vectors (see Figure 1); 1E13 =  $1 \times 10^{13}$  vg per mouse, etc. Replicates ( $n = x$ ) for each dose and muscle group (Gastroc / Dia / TA) were as follows: **a:** 1E13 / 1E12 ( $n = 3 / 2 / 1$ ), **b:** 2E12 / 1E13 ( $n = 3 / 3 / 3$ ), **c:** 5E12 / 5E12 ( $3 / 3 / 3$ ), **d:** 1E13 / 1E13 ( $4 / 4 / 4$ ), mdx control ( $n = 4 / 4 / 4$ ). . None of the vector doses and ratios provided statistically significant improvements in specific force. Statistical significance was determined by two-way ANOVA with Tukey's post hoc test. Values are represented as mean  $\pm$  SEM.

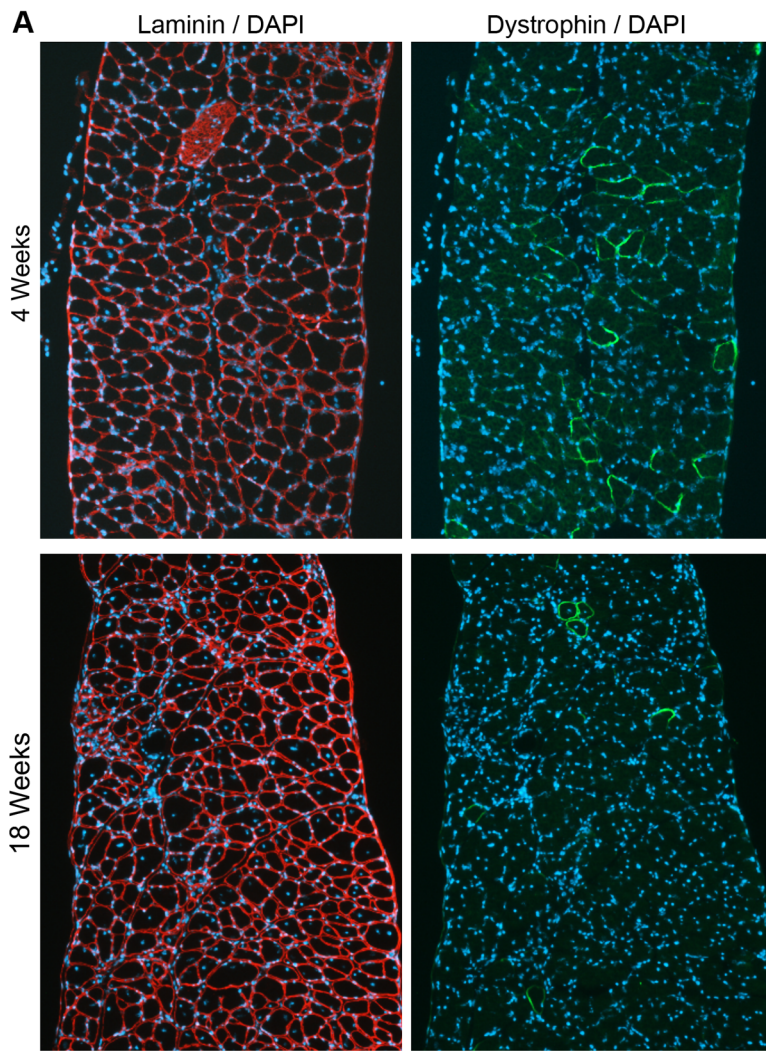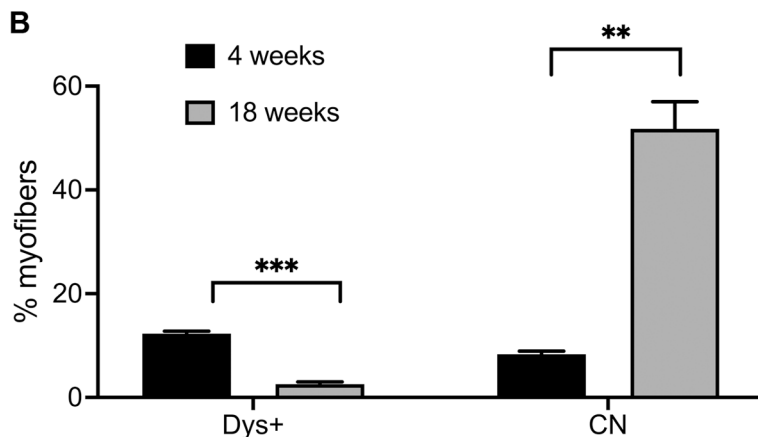

**Figure S2: Myofibers of mouse diaphragms exhibit reduced dystrophin expression and increased central nucleation between 4- and 18 weeks post *in vivo* gene editing.** **A)** IF analysis of diaphragm cross-sections from gene-edited mice at 4- (top row) and 18- (bottom row) weeks post-treatment, stained for  $\alpha_2$ -Laminin (red) & DAPI (light blue), (left column); and for dystrophin (green) & DAPI (right panels). Images acquired at 100X magnification. **B)** Quantification of percent dystrophin-positive (Dys+), and centrally nucleated (CN) myofibers on mouse diaphragm cross-sections at 4 weeks (n = 2 mice) and 18 weeks (n = 4 mice) post-treatment. Values represent mean  $\pm$  SEM. Statistical significance was determined using individual Student's t-tests, with statistical significance set to  $p < 0.05$ , (\*\*  $p < 0.01$ , \*\*\*  $p < 0.001$ ).

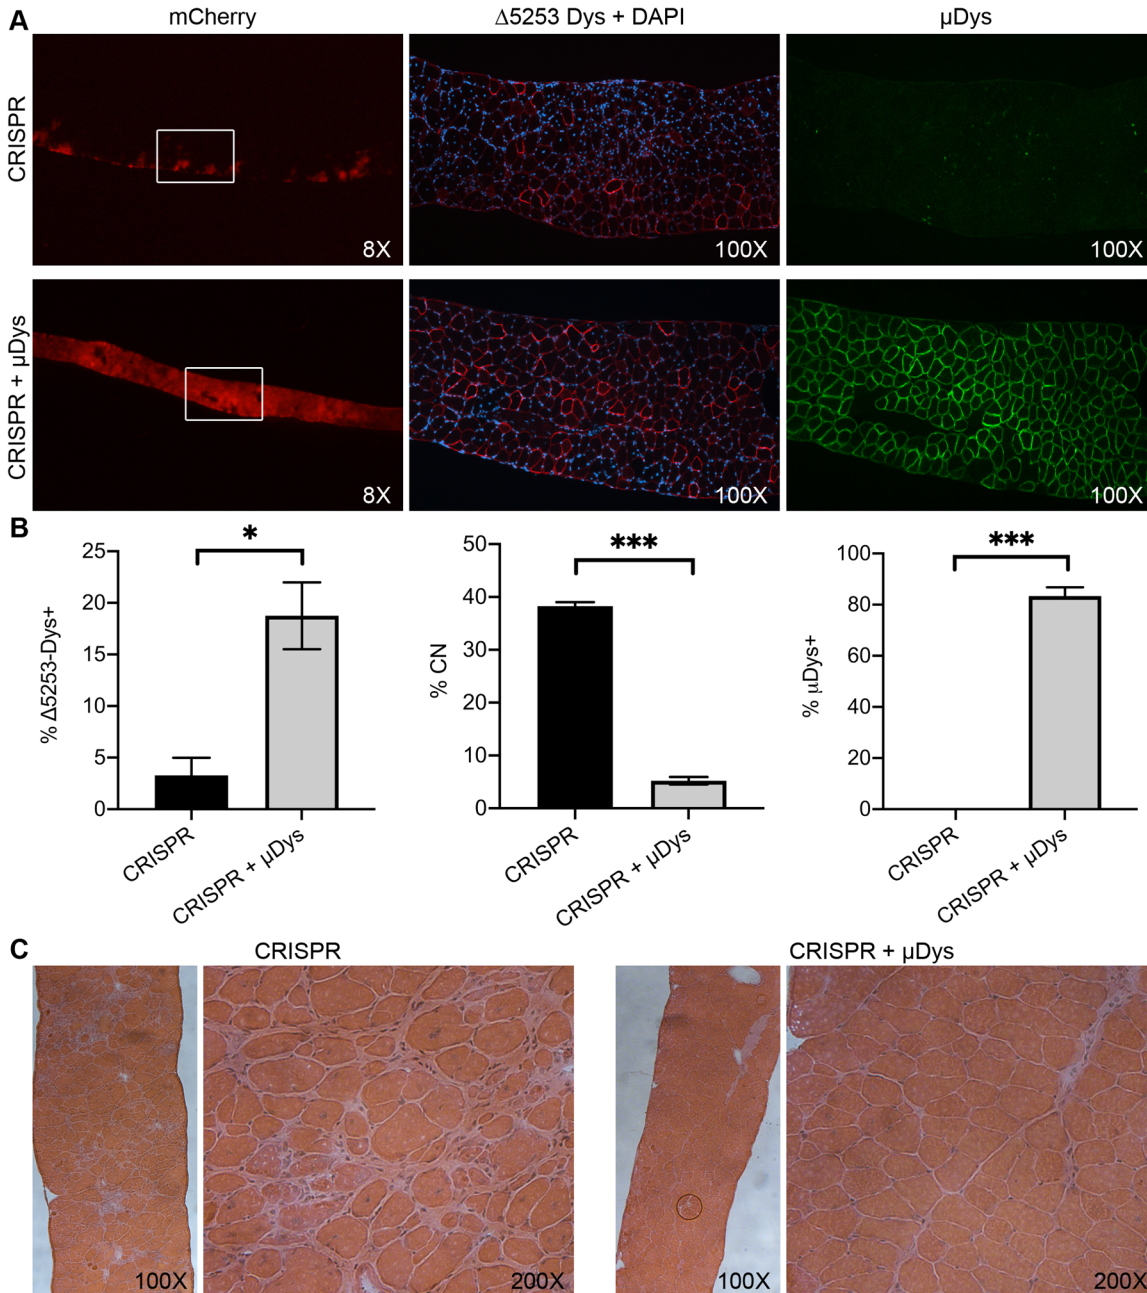

**Figure S3: Microdystrophin stabilizes dystrophic skeletal muscle and preserves  $\Delta 5253$ -dystrophin expression.**

**A)** Representative images of diaphragm muscle cross-sections depicting mCherry expression (left panels, acquired at 8X magnification),  $\Delta 5253$ -dystrophin & DAPI ( $\Delta 5253$ -Dys, middle panels) and microdystrophin ( $\mu$ Dys, right panels); at 18 weeks post-treatment with CRISPR/Cas9 (CRISPR) or CRISPR/Cas9 with  $\mu$ Dys (CRISPR+ $\mu$ Dys), acquired at 100X magnification. **B)** Quantification of percent  $\Delta 5253$ -dystrophin positive myofibers (left), centrally nucleated (CN) myofibers (middle), and microdystrophin positive myofibers ( $\mu$ Dys<sup>+</sup>, right): on treated diaphragm cross-sections (n = 3 mice). **C)** Representative diaphragm cross-sections from CRISPR- and CRISPR+ $\mu$ Dys treated mice stained with hematoxylin and eosin. Images acquired at 100X (left panels) and 200X (right panels) magnification respectively. Values represent mean  $\pm$  SEM. Statistical significance was determined using individual Student's t-tests, with statistical significance set to  $p < 0.05$ , (\*  $p < 0.05$ , \*\*\*  $p < 0.001$ ).



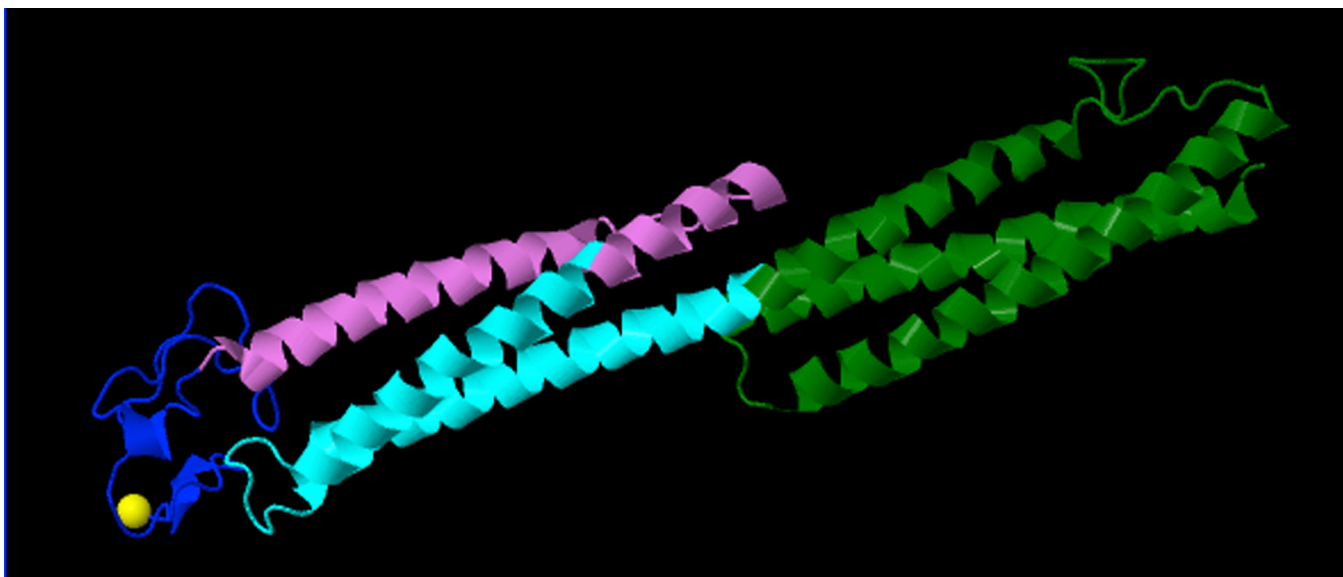

**Figure S4:** *In silico* model of the region spanning hinge 3 to repeat 22 of  $\Delta 5253$  dystrophin. Deletion of exons 52-53 is predicted to generate a hybrid repeat 20/21 that preserves the filamentous structure encoded within of the targeted region (blue = hinge 3, Violet = repeat 20, cyan = repeat 21, green = repeat 22), (<http://edystrophin.genouest.org>).

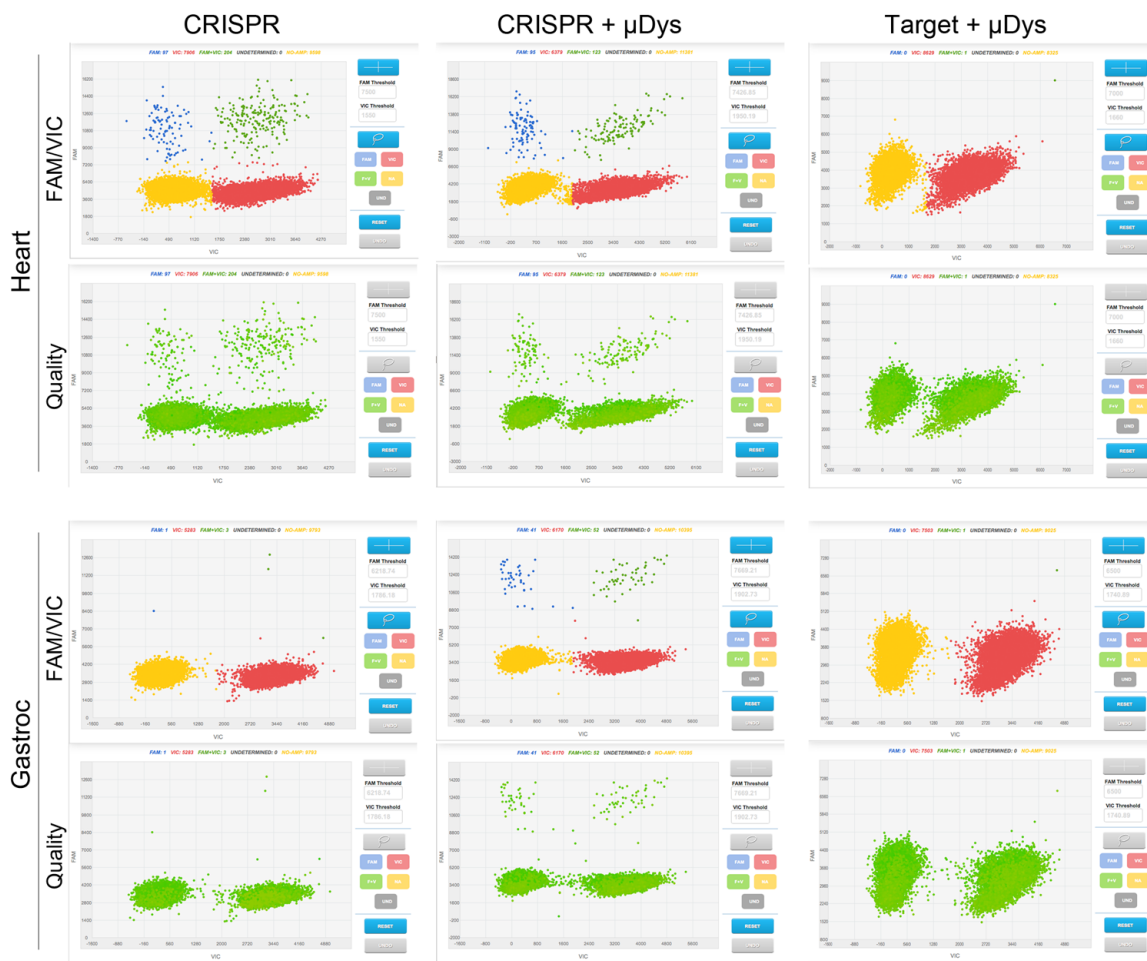

**Figure S5: Examples of FAM/VIC calls and data quality determination using Thermo-Fisher’s dPCR AnalysisSuite software.** Shown are representative FAM/VIC dPCR calls and corresponding quality plots for genomic DNA isolated from Heart (Top) and Gastroc (Bottom) of mice treated with nuclease- and target vectors (CRISPR), CRISPR with microdystrophin co-delivery (CRISPR +  $\mu$ Dys), or target vectors only with microdystrophin (Target +  $\mu$ Dys).

## List of Primers/probes

### *gRNA oligos*

|                  |           |                        |
|------------------|-----------|------------------------|
| SAgRNA-intron 51 | (Forward) | GATACTAGGGTGGCAAATAGA  |
| SAgRNA-intron 51 | (Reverse) | TCTATTTGCCACCCTAGTATC  |
| SAgRNA-intron 53 | (Forward) | GAGATAAATCCCTGCTTATCAC |
| SAgRNA-intron 53 | (Reverse) | GTGATAAGCAGGGATTATCTC  |

### *PCR primers*

|                           |           |                           |
|---------------------------|-----------|---------------------------|
| (vg)nuclease vector       | (Forward) | TGCCCTCATTCTACCACCAC      |
| (vg)nuclease vector       | (Reverse) | TCGGTCAGCAGGTTGTAGTC      |
| (vg)Target vector         | (Forward) | CACCGATACTAGGGTGGCAAATAGA |
| (vg)Target vector         | (Reverse) | GGCGTACTTGGCATATGAT       |
| (vg) $\mu$ Dys5 vector    | (Forward) | TGCCCTCATTCTACCACCAC      |
| (vg) $\mu$ Dys5 vector    | (Reverse) | GCCTTGTTACGTTGTTACAGG     |
| $\Delta$ 5253 (intron 51) | (Forward) | CTCATACCCAAAGCTGCTAG      |
| $\Delta$ 5253 (intron 53) | (Reverse) | ACTGATAACTGATAGCACATTGC   |

### *RT-PCR Primers*

|                            |           |                      |
|----------------------------|-----------|----------------------|
| RT $\Delta$ 5253 (exon 51) | (Forward) | GCCATCTTCTTTGCTGTTGG |
| RT $\Delta$ 5253 (exon 54) | (Reverse) | TCCCGAAGAAGTTTCAGTGC |

### *Digital PCR primers/probes*

|                                 |            |                                |
|---------------------------------|------------|--------------------------------|
| dPCR-intron 51                  | (Forward)  | ATGAAGTTTTAGAACAAAAATGAGGTAGGT |
| dPCR-intron 53                  | (Forward)  | GAATCAGAAGCATGTCCTTTGC         |
| dPCR-intron 53                  | (Reverse)  | GTGTTCTTAAAAGAATGGTGTGGTG      |
| $\Delta$ 5253probe (intron 51)  | (- strand) | CCACCCTAGTATCTATATTCAATGGCCCAA |
| HKprobe (intron 53)             | (- strand) | TCTCACTTCATAGAGTGCTTGCCTAGC    |
| dRT-exon 51                     | (Forward)  | GCAGACTTCAACCGAGCTTG           |
| dRT-exon 54                     | (Reverse)  | GGTATCATCAGCAGAATAGTCCCG       |
| $\Delta$ 5253probe (exon 51/54) | (+ strand) | TCATCAAACAGAAGCAGTTGGCCAAAGACC |
| HKprobe (exon 53)               | (- strand) | CTGCAGCTGTTCTTGAACCTCATCCCAC   |
